# Supplementary material for: Association of Maternal Gestational Vitamin D Supplementation with Respiratory Health of Young Children
Source: MDPI journal article supplement (doi:10.3390/nu15102380), 2023-05-19
Supplement: s1 [file s1]

Supplementary data

Supplementary Table S1: Congenital abnormalities (CIM10 codes).

| <b>Congenital abnormalities (CIM10 codes)</b> |           |
|-----------------------------------------------|-----------|
| Neurologic                                    | Q00 – Q07 |
| Cardiovascular                                | Q20 - Q28 |
| Respiratory                                   | Q30 - Q34 |
| Cleft lip and palate                          | Q35 - Q37 |
| Digestive                                     | Q39 - Q44 |
| Renal and urinary                             | Q60 - Q64 |
| Osteo-articular, muscular<br>and cutaneous    | Q76 - Q81 |
| Chromosomal and genetic                       | Q90 - Q99 |

Supplementary Table S2: Characteristics of study population according to maternal gestational vitamin D3 supplementation.

| Paramètres            | Overall<br>(n = 125,756) | Maternal Vitamin<br>D3<br>supplementation<br>(n = 54,696) | No maternal<br>Vitamin D3<br>supplementation<br>(n = 71,060) |
|-----------------------|--------------------------|-----------------------------------------------------------|--------------------------------------------------------------|
| Maternal age (years)  |                          |                                                           |                                                              |
| <20                   | 1612 (1)                 | 610 (1)                                                   | 1002 (1)                                                     |
| 20-29                 | 53,920 (43)              | 23,357 (43)                                               | 30,563 (43)                                                  |
| 30- 39                | 64,709 (51)              | 28,243 (52)                                               | 36,466 (51)                                                  |
| ≥ 40                  | 5515 (4)                 | 2486 (4)                                                  | 3029 (4)                                                     |
| Pregnancy follow-up   |                          |                                                           |                                                              |
| Inadequate            | 9319 (7)                 | 2696 (5)                                                  | 6623 (9)                                                     |
| Intermediate          | 20,824 (17)              | 8754 (16)                                                 | 12,070 (17)                                                  |
| Adequate              | 95,613 (76)              | 43,246 (79)                                               | 52,367 (74)                                                  |
| CHCI                  | 30,524 (24)              | 14,075 (26)                                               | 16,449 (23)                                                  |
| NDI (Affluent)        | 28,828 (23)              | 11,636 (21)                                               | 17,192 (24)                                                  |
| Obstetrical pathology | 19,766 (16)              | 9085 (17)                                                 | 10,681 (15)                                                  |
| Caesarean section     | 15,858 (13)              | 6746 (12)                                                 | 9112 (13)                                                    |
| Birth season          |                          |                                                           |                                                              |
| Spring-Summer         | 50,999 (40)              | 21,886 (40)                                               | 29,113 (41)                                                  |
| GA (weeks)            |                          |                                                           |                                                              |
| 36                    | 2258 (2)                 | 829 (1)                                                   | 1429 (2)                                                     |
| 37                    | 6293 (5)                 | 2540 (5)                                                  | 3753 (5)                                                     |
| 38                    | 18,469 (15)              | 7715 (14)                                                 | 10754 (15)                                                   |
| 39                    | 37,689 (30)              | 16,353 (30)                                               | 21,336 (30)                                                  |
| ≥ 40                  | 61,047 (48)              | 27,259 (50)                                               | 33,788 (47)                                                  |
| Female sex            | 62,012 (49)              | 26,966 (49)                                               | 35046 (49)                                                   |
| Birth weight          |                          |                                                           |                                                              |
| AGA                   | 102,274 (82)             | 44,685 (82)                                               | 58,039 (82)                                                  |
| SGA                   | 11,479 (9)               | 4859 (9)                                                  | 6620 (9)                                                     |
| LGA                   | 11,553 (9)               | 5152 (9)                                                  | 6401 (9)                                                     |
| Neonatal pathology    | 15,217 (12)              | 7111 (13)                                                 | 8106 (11)                                                    |
| Respiratory disease   | 46,142 (37)              | 19,938 (36)                                               | 26,204 (37)                                                  |

Data are n (%).AGA: birth weight adapted for gestational age, SGA: small for gestational age, LGA: large for gestational age; CHCI: complementary healthcare insurance coverage; NDI: neighborhood deprived index. Relationships for all characteristics and status of maternal VitD supplementation were significant ( $p<0.0001$ ) for all, except for cesarean section, female sex and birth weight for which  $p=0.001$ .
